# Supplementary material for: Non-invasive assessment of murine PD-L1 levels in syngeneic tumor models by nuclear imaging with nanobody tracers
Source: PubMed Central journal article supplement (PMC5522039; doi:10.18632/oncotarget.16708), 2017-03-30
Supplement: oncotarget-08-41932-s001.pdf [file oncotarget-08-41932-s001.pdf]

# Non-invasive assessment of murine PD-L1 levels in syngeneic tumor models by nuclear imaging with nanobody tracers

## Supplementary Materials

```

1          10          20          30          40          50          60          70          80          90          100         110         120
|*****|*****|*****|*****|*****|*****|*****|*****|*****|*****|*****|*****|*****|*****|*****
<----- FR1-IMGT -----> <CDR1-IMGT-> <- FR2-IMGT-----> <CDR2IMGT> <----- FR3 -IMGT-----> <----- CDR3- IMGT-----> <FR4-IMGT->
A1 QVQLQESGG-GLVQPGGSLRLSCAAS GFTL----DYIA IGWFRQAPGKEREGVSC ISSS--DGST YYADSVK-GRFTISRDNAKNTVYLQMSLKPEDTAVYIC GISGSCLL-----EDYGM DY WGQGTQVTSS
B1 QVQLQESGG-GLVHPGGSRLRLSCAAS GFSL----DNYA IGWFRQAPGKEREGVSC ISSS--EGRR YYADFVK-GRFTISRDNAKNTAFGLMNSLKPEDTADYIC ATVGFCSQ-----YGMFVGDY WGQGTQVTSS
C1 QVQLQESGG-GLVQTGGSLRLSCAAS GSTV----SSSM MAWWRQTPGNQRELVAL VARG--NNNTN YV-DSVK-GRFTVSRDNAKNTMYLQMSLKPEDTAVYIC RILSV-----NGI WY WGQGTQVTSS
C2 QVQLQESGG-GLVQTGGSLRLSCAAS GSTV----SSSM MAWWRQTPGNQRELVAL VARG--NNNTN YV-DSVK-GRFTVSRDNAKNTMYLQMSLKPEDTAVYIC RILSV-----NGI WY WGQGTQVTSS
C3 QVQLQESGG-GLVQPGGSLRLSCAAS GSTV----SSSM MAWWRQTPGNQRELVAL VASG--NNNTN YV-DSVK-GRFTVSRDNAKNTMYLQMSLKPEDTAVYIC RILSV-----NGI WY WGQGTQVTSS
C4 QVQLQESGG-GLVQPGGSLRLSCAAS GSTV----SSSM MAWWRQTPGNQRELVAL VASG--NNNTN YV-DSVK-GRFTVSRDNAKNTMYLQMSLKPEDTAVYIC RILSV-----NGI WY WGQGTQVTSS
C5 QVQLQESGG-GLVQAGGSLRLSCAAS GSTV----SSSM MAWWRQTPGNQRELVAL VASG--NNNTN YV-DSVK-GRFTVSRDNAKNTMYLQMSLKPEDTAVYIC RILSV-----NGI WY WGQGTQVTSS
C6 QVQLQESGG-GLVQAGDSLRLSCAAS GSTV----SSSM MAWWRQTPGNQRELVAL VASG--NNNTN YV-DSVK-GRFTVSRDNAKNTMYLQMSLKPEDTAVYIC RILSV-----NGI WY WGQGTQVTSS
C7 QVQLQESGG-GLVQAGESLRLSCAAS GSSL----SHKS VGNWRQTPGNQRELVAL VASG--NNNTN YV-DSVK-GRFTVSRDNAKNTMYLQMSLKPEDTAVYIC RILSV-----NGI WY WGQGTQVTSS
C8 QVQLQESGG-GLVQAGESLRLSCAAS GSTV----SSST MAWWRQTPGNQRELVAL VASG--GNNTN YV-DSVK-GRFTVSRDNAKNTMYLQMSLKPEDTAVYIC RILSM-----NGI WY WGQGTQVTSS
C9 QVQLQESGG-GLVQAGESLRLSCAAS GSTV----SSST MAWWRQTPGNQRELVAL VASG--GNNTN YV-DSVK-GRFTVSRDNAKNTMYLQMSLKPEDTAVYIC RILSM-----NGI WY WGQGTQVTSS
C10 QVQLQESGG-GLVQTGGSLRLSCAAS GSTV----SSST MAWWRQTPGNQRELVAL VASG--GNNTN YV-DSVK-GRFTVSRDNAKNTMYLQMSLKPEDTAVYIC RILSM-----NGI WY WGQGTQVTSS
C11 QVQLQESGG-GLVQTGGSLRLSCAAS GSTV----SSST MAWWRQTPGNQRELVAL VASG--GNNTN YV-DSVK-GRFTVSRDNAKNTMYLQMSLKPEDTAVYIC RILSV-----NGI WY WGQGTQVTSS
C12 QVQLQESGG-GLVQTGGSLRLSCAAS GSTV----SSST MAWWRQTPGNQRELVAL VASG--GNNTN YV-DSVK-GRFTVSRDNAKNTMYLQMSLKAEDTAVYIC RILSV-----NGI WY WGQGTQVTSS
C13 QVQLQESGG-GLVQTGGSLRLSCAAS GSTV----SSST MAWWRQTPGNQRELVAL VGSG--GNIN YV-DSVK-GRFTVSRDNAKNTMYLQMSLKPEDTAVYIC RILSV-----NGI WY WGQGTQVTSS
C14 QVQLQESGG-GLVQTGGSLRLSCAAS GSTV----SSST MAWWRQTPGNQRELVAL VGLG--GNIN YV-DSVK-GRFTVSRDNAKNTMYLQMSLKPEDTAVYIC RILSV-----NGI WY WGQGTQVTSS
C15 QVQLQESGG-GLVQTGGSLRVCAVS GSTV----SSST MAWWRQTPGNQRELVAL VDSG--GKSN YV-DSVK-GRFTVSRDNAKNTMYLQMSLKPEDTAVYIC RILSV-----NGI WY WGQGTQVTSS
C16 QVQLQESGG-GLVQAGGSLRVCAVS GSTV----SSST MAWWRQTPGNQRELVAL VDSG--GKSN YV-DSVK-GRFTVSRDNAKNTMYLQMSLKPEDTAVYIC RILSV-----NGI WY WGQGTQVTSS
D1 QVQLQESGG-GLVQAGGSLRLSCAAS GITV----SINA MAWWRQPPGKQRELVAL IIG---GST RYADSVK-GRFTISRDNAKNTVYLQMSLKPEDTAVYIC NTR-----AY WGQGTQVTSS
E1 QVQLQESGG-GLVQAGGSLRLSCATS GSIP----SII S MGWYRQAPGKQRELVAL VFRG--GST VYADSVK-GRFTISGDIKNTVYLQMSLKPEDTAVYIC NVKSI-----GTAQY WGQGTQVTSS
E2 QVQLQESGG-GLVQAGGSLRLSCATS GSIP----SII S MGWYRQAPGKQRELVAL VFRG--GST VYADSVK-GRFTISGDIKNTVYLQMSLKPEDTAVYIC NVKSI-----GTAQY WGQGTQVTSS
E3 QVQLQESGG-GLVQAGGSLRLSCATS GSIP----SII S MGWYRQAPGKQRELVAL VFRG--GST VYADSVK-GRFTISGDIKNTVYLQMSLKPEDTAVYIC NVKSI-----GTAQY WGQGTQVTSS
E4 QVQLQESGG-GLVHPGGSRLRLSCATS GSIP----SII S MGWYRQAPGKQRELVAL VFRG--GST VYADSVK-GRFTISGDIKNTVYLQMSLKPEDTAVYIC NAKPI-----GTAQY WGQGTQVTSS
E5 QVQLQESGG-GLVHPGGSRLRLSCATS GSIP----SII S MGWYRQAPGKQRELVAL VFRG--GST VYADSVK-GRFTISGDIKNTVYLQMSLKPEDTAVYIC NAKPI-----GTAQY WGQGTQVTSS
E6 QVQLQESGG-GLVQAGGSLRLSCATS GSIP----SII S MGWYRQAPGKQRELVAL VFRG--GST VYADSVK-GRFTISGDIKNTVYLQMSLKPEDTAVYIC NAKPI-----GTAQY WGQGTQVTSS
F1 QVQLQESGG-GLVQAGGSLRLSCATS RTTS----SINI MAWWRQAPGKRRELVAL SIRG---GNT HYADSVK-GRFTISGVHAKNTVYLQMSLKPEDTAVYIC NTG-----GY WGQGTQVTSS
G1 QVQLQESGG-GLVQPGGSLRLSCAAS GSIS----SFNF MGWYRQAPGKQRELVAL STNS---GVT NVAGSVK-GRFTISRDNAKNTVYLQMSLKPEDTAVYIC RVGAM-----GNLY WGQGTQVTSS
G2 QVQLQESGG-GLVQPGGSLRLSCAAS GSIS----SFNF MGWYRQAPGKQRELVAL STNS---GVT NVAGSVK-GRFTISRDNAKNTVYLQMSLKPEDTAVYIC RVGAM-----GNLY WGQGTQVTSS
G3 QVQLQESGG-GLVQPGGSLRLSCAAS GSIS----SFNF MGWYRQAPGKQRELVAL STNS---GVT NVAGSVK-GRFTISRDNAKNTVYLQMSLKPEDTAVYIC RVGAM-----GNLY WGQGTQVTSS
G4 QVQLQESGG-GLVQAGGSLRLSCAAS GSIS----SFNF MGWYRQAPGKQRELVAL STNS---GVT NVAGSVK-GRFTISRDNAKNTVYLQMSLKPEDTAVYIC RVGAM-----GNLY WGQGTQVTSS
G5 QVQLQESGG-GLVQPGGSLRLSCAAS GSFF----RTYI VSYRQAPGKRREAVAV MSNS---GNT NYADSVK-GRFTISRDNAKNTVYLQMSLKPEDTAVYIC NLLKVTV-----VPPANY WGQGTQVTSS
G6 QVQLQESGG-GLVQPGESLRLSCVAS GSFF----RTYI VSYRQAPGKRREAVAV MSNS---GNT NYADSVK-GRFTISRDNAKNTVYLQMSLKPEDTAVYIC NLLKVTV-----VPPANY WGQGTQVTSS
G7 QVQLQESGG-GLVQSGGSLRLSCAAS GSFF----RTYI VSYRQAPGKRREAVAV MSNS---GNT NYADSVK-GRFTISRDNAKNTVYLQMSLKPEDTAVYIC NLLKVTV-----VPPANY WGQGTQVTSS
H1 QVQLQESGG-GLVQAGGSLRLSCAAS GRTF----SSRG NGWFRQAPGKEREFVAA ISWG---GGTT YADSVK-GRFTISRDNAKNTVYLQMSLKPEDTAVYIC AAHTGF-----PHEYDY WGQGTQVTSS
I1 QVQLQESGG-GLVQAGGSLRLSCAAS GRTF----RRYD NGWFRQAPGKEREFVAA STWS---ADDT YADSVK-GRFTISRDNAKNTVYLQMSLKPEDTAVYIC AAHTGF-----PHEYDY WGQGTQVTSS
L1 QVQ-----AGGSLRLSCAAS GTRY----CRYD MSWYRQAPGKEREFVAA IDSY---GSP TYADTVL-GRFTISRDNAKNTVYLQMSLKAEDTAVYIC KIDSTGWS-----SRCKTY WGQGTQVTSS
M1 QVQ-----AGSLRLACTLF KYPT----NNLC LAWFRQAPGKEREFVAA LNDG---GVGT YYAKSVE-GRFTISQDKSNKGYLQMDLKPEDTAVYIC AADPTSRCCNNYVQGRWVHIEGSRVWD WGQGTQVTSS

```

**Supplementary Figure 1: Selection of anti-mouse-PD-L1 specific Nbs.** Amino acid sequence alignment of 37 Nbs binding PD-L1. The Nb sequence includes three complementarity-determining regions (CDR 1, 2, 3; indicated in red) and four framework regions (FR1-4, indicated in black). FRs are relatively conserved but CDRs vary widely among Nbs.

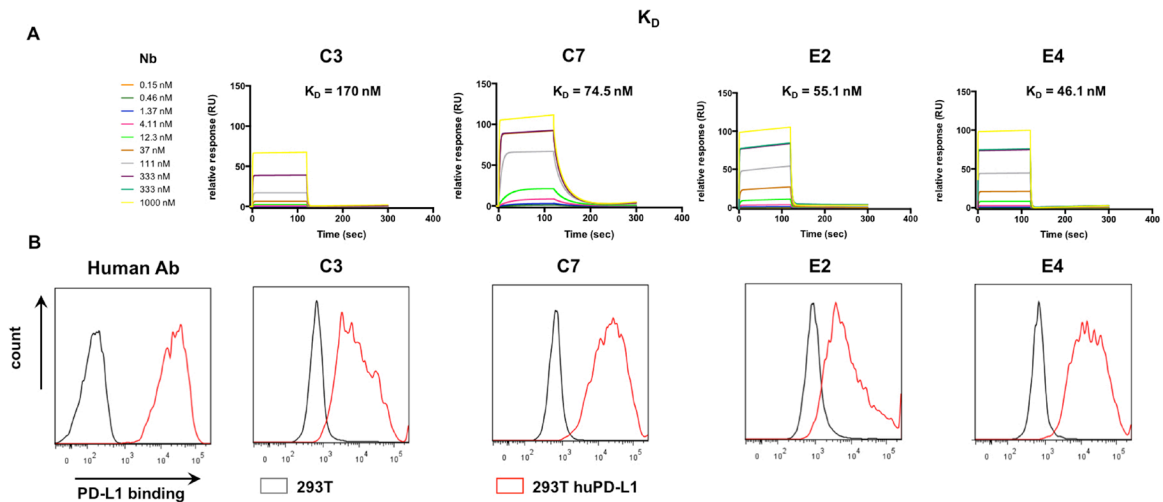

**Supplementary Figure 2: Summary of the affinity for human PD-L1 of purified anti-PD-L1 Nbs C3, C7, E4 and E2.** (A) Affinity/kinetics SPR study of purified Nbs interacting with immobilized His-tagged recombinant human PD-L1 protein. Sensorgrams of different concentrations of the Nbs are shown ( $n = 1$ ). (B) Representative flow cytometry results, showing staining of unmodified HEK293T cells (grey line) or HEK293T cells lentivirally modified to express human PD-L1 (293T huPD-L1, red line) with mAbs specific for human PD-L1 or Nbs C3, C7, E4 and E2 ( $n = 3$ ).

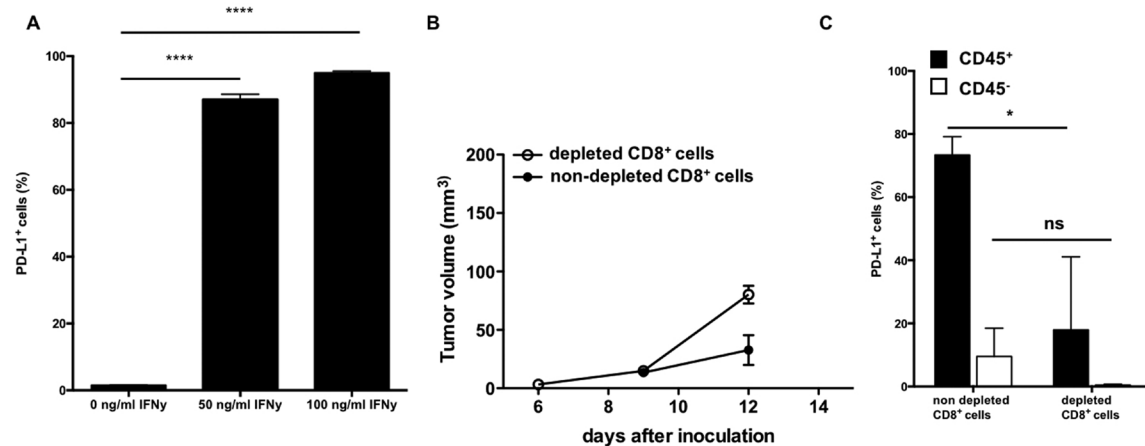

**Supplementary Figure 3: (A)** TC-1 cells modified with shRNA targeting mouse PD-L1 (knock-down, KD) were left untreated or treated with 50 or 100 ng/ml recombinant mouse IFN- $\gamma$ . Flow cytometry was performed to measure the percentage of TC-1 cells that express PD-L1 ( $n = 3$ ). **(B–C)** PD-L1 KD TC-1 cells were injected subcutaneously at the tail base of wild type mice, which were pre-treated with a CD8<sup>+</sup> depleting antibody (depleted CD8<sup>+</sup> cells) or an isotype matched control antibody (non-depleted CD8<sup>+</sup> cells). **(B)** Tumor growth was measured every other day. The tumor size in function of time is shown as mean  $\pm$  SEM. **(C)** Tumors were isolated on day 12 to evaluate the expression of PD-L1 on tumor cells (CD45<sup>-</sup>, white bar) and tumor-infiltrating immune cells (CD45<sup>+</sup>, black bar) in flow cytometry. The graph summarizes the percentage of PD-L1 expressing cells as mean  $\pm$  SEM ( $n = 3$  for non CD8-depleted mice and  $n = 4$  for CD8-depleted mice).

**Supplementary Table 1: Characterization of the periplasmic extracts of 37 anti-PD-L1 Nbs**

| Nb  | Flow cytometry (MFI) |        |        |                    |        |        |        |        |        |
|-----|----------------------|--------|--------|--------------------|--------|--------|--------|--------|--------|
|     | ELISA (OD-value)     |        |        | Biacore (affinity) |        | Human  |        | Mouse  |        |
|     | Mouse                | Human  | No Ag  | Mouse              | Human  | PD-L1+ | PD-L1- | PD-L1+ | PD-L1- |
| A1  | 2.5794               | 0.0945 | 0.0968 | no signal          | 23 nM  | 10174  | 699    | 116    | 129    |
| B1  | 0.897                | 0.2141 | 0.195  | 123 nM             | 6 nM   | 716    | 688    | -56    | -45    |
| C1  | 3.6802               | 0.4291 | 0.1554 | 327 pM             | 143 nM | 14251  | 1254   | 1101   | 215    |
| C2  | 3.743                | 0.4727 | 0.1838 | ND                 | ND     | ND     | ND     | ND     | ND     |
| C3  | 3.7828               | 1.3394 | 0.1525 | 140 pM             | 32 nM  | 3315   | 272    | 431    | 36     |
| C4  | 3.7723               | 0.8755 | 0.1812 | 187 pM             | 342 nM | 10792  | 348    | 581    | 43     |
| C5  | 3.6962               | 0.8694 | 0.1243 | ND                 | ND     | ND     | ND     | ND     | ND     |
| C6  | 3.7024               | 0.6344 | 0.1532 | 289 pM             | 94 nM  | 7528   | 691    | 770    | 208    |
| C7  | 3.7739               | 1.1077 | 0.3419 | 3.1 nM             | 27 nM  | 25555  | 2300   | 275    | -4     |
| C8  | 3.7573               | 1.1562 | 0.1777 | ND                 | ND     | ND     | ND     | ND     | ND     |
| C9  | 3.6941               | 0.7949 | 0.1238 | 2.2 nM             | 44 nM  | 5050   | 515    | 461    | 234    |
| C10 | 3.7161               | 0.6557 | 0.2129 | 6.7 nM             | 141 nM | 20856  | 572    | 452    | 98     |
| C11 | 3.8662               | 0.5572 | 0.2175 | 12 nM              | 246 nM | 27267  | 577    | 378    | 105    |
| C12 | 3.5804               | 0.4049 | 0.0917 | 11.4 nM            | 181 nM | 19746  | 1116   | 348    | -46    |
| C13 | 3.5369               | 1.0144 | 0.1249 | 33 nM              | 162 nM | 26347  | 2671   | 36     | -8     |
| C14 | 3.6701               | 0.7512 | 0.0911 | 1.8 nM             | 71 nM  | 8650   | 1350   | 96     | 91     |
| C15 | 3.6368               | 0.4461 | 0.1504 | 6.5 nM             | 335 nM | 13530  | 684    | 27     | -51    |
| C16 | 3.6768               | 0.5203 | 0.1853 | 15 nM              | 520 nM | 15277  | 411    | 202    | 142    |
| D1  | 3.6391               | 2.8148 | 2.4878 | 12 nM              | 291 nM | 3054   | 506    | 196    | -72    |
| E1  | 3.6391               | 2.8148 | 2.4878 | 2.3 nM             | 12 nM  | 4944   | 681    | 135    | -29    |
| E2  | 2.9933               | 1.0964 | 0.5687 | 5.6 nM             | 94 nM  | 1301   | 34     | 283    | 119    |
| E3  | 3.9717               | 3.0705 | 1.7095 | ND                 | ND     | 1893   | 429    | -46    | -62    |
| E4  | 3.9304               | 3.0665 | 1.0478 | ND                 | ND     | 5110   | 259    | 69     | 64     |
| E5  | 2.8355               | 0.1141 | 0.0989 | 14 nM              | 54 nM  | 1704   | 454    | 37     | -7     |
| E6  | 2.4418               | 0.6909 | 0.3211 | 6.9 nM             | 217 nM | 2348   | 500    | -54    | -20    |
| F1  | 3.6697               | 0.4092 | 0.2388 | ND                 | ND     | ND     | ND     | ND     | ND     |
| G1  | 3.5102               | 0.3395 | 0.1831 | 4.4 nM             | 50 nM  | 2795   | 616    | 120    | -5     |
| G2  | 4                    | 2.3125 | 1.4331 | 5.5 nM             | 158 nM | 1936   | 423    | 341    | 43     |
| G3  | 3.7986               | 1.6653 | 0.77   | 5.0 nM             | 907 nM | 1543   | 699    | 55     | -46    |
| G4  | 3.892                | 1.3798 | 0.7293 | 6.2 nM             | 74 nM  | 822    | 305    | 227    | 88     |
| G5  | 3.9486               | 3.5717 | 2.5806 | 3.9 nM             | 16 nM  | 3357   | 336    | 289    | -29    |
| G6  | 4                    | 3.7483 | 2.912  | 5.0 nM             | 21 nM  | 5902   | 8522   | -47    | 21     |
| G7  | 1.0341               | 0.3335 | 0.2443 | 3.4 nM             | 129 nM | 2870   | 159    | 319    | 141    |
| H1  | 3.7375               | 0.8713 | 0.6773 | ND                 | ND     | ND     | ND     | ND     | ND     |
| I1  | 3.5587               | 0.2076 | 0.2332 | 67 nM              | 322 nM | 3697   | 2309   | 28     | -35    |
| L1  | 2.307                | ND     | 0.899  | 15 nM              | 34 nM  | ND     | ND     | ND     | ND     |
| M1  | ND                   | 5.975  | 0.254  | 13 nM              | 17 nM  | ND     | ND     | ND     | ND     |

Summary of the binding of the Nbs to mouse or human PD-L1 using ELISA, the affinity of the Nbs for mouse and human PD-L1 using SPR and the binding of the Nbs to cells expressing mouse (B16) or human (293T) PD-L1 using flow cytometry.

MFI, Mean Fluorescence Intensity; ND, not determined.

**Supplementary Table 2: Biodistribution of  $^{99m}\text{Tc}$ -labeled Nbs C3, C7, E4 and E2 in wild type (WT) or PD-L1-deficient (KO) mice 80 minutes after intravenous administration. Data are expressed as mean and standard deviation (SD) of percentage of injected activity per gram of tissue (%IA/g) ( $n = 3$ ). See Supplementary\_Table\_2**

**Supplementary Table 3: Tissue versus blood (T/B) and anti-PD-L1 Nb versus control (ctrl) Nb uptake ratios in wild type (WT) mice, and tissue uptake ratios in WT versus PD-L1-deficient (KO) mice 80 minutes after intravenous administration of  $^{99m}\text{Tc}$ -labeled Nbs C3, C7, E4 and E2. Ratios are calculated from the data presented in supplementary table 2 ( $n = 3$ ). See Supplementary\_Table\_3**

**Supplementary Table 4: Biodistribution of  $^{99m}\text{Tc}$ -labeled Nbs C3 and E2 injected in wild type (WT) mice bearing PD-L1 knock-down (KD) or PD-L1 knock-in (KI) cells (left). Biodistribution of  $^{99m}\text{Tc}$ -labeled Nbs C3 and E2 injected in wild type (WT) mice bearing wild type (WT) TC-1 cells or injected in CD8+-depleted PD-L1 KO (KO) mice bearing PD-L1 knock-out (KO) cells (right), 80 minutes after intravenous administration. Data are expressed as mean and standard deviation (SD) of percentage of injected activity per gram of tissue (%IA/g) ( $n = 6$ ). See Supplementary\_Table\_4**

**Supplementary Table 5: Tissue-to-blood uptake ratios of <sup>99m</sup>Tc-labeled Nbs C3 and E2 injected in wild type (WT) mice bearing PD-L1 knock-down (KD) or PD-L1 knock-in (KI) cells (left)**

| Tumor                   | shRNA-modified TC-1 model |       |       |         |       |       | CRISPR/Cas9-modified TC-1 model |      |       |         |       |       |
|-------------------------|---------------------------|-------|-------|---------|-------|-------|---------------------------------|------|-------|---------|-------|-------|
|                         | KD                        |       |       | KI      |       |       | WT                              |      |       | KO      |       |       |
|                         | Mice                      | WT    |       | WT      |       | WT    |                                 | WT   |       | KO      |       |       |
|                         | Ctrl Nb                   | C3    | E2    | Ctrl Nb | C3    | E2    | Ctrl Nb                         | C3   | E2    | Ctrl Nb | C3    | E2    |
| <b>thymus</b>           | 0,3                       | 3,8   | 3,4   | 0,3     | 3,6   | 3,6   | 0,3                             | 2,2  | 2,6   | 0,3     | 0,2   | 0,4   |
| <b>heart</b>            | 0,4                       | 4,1   | 4,0   | 0,4     | 3,7   | 1,8   | 0,4                             | 2,5  | 1,4   | 0,4     | 0,4   | 0,5   |
| <b>lungs</b>            | 0,7                       | 7,1   | 6,4   | 0,8     | 6,4   | 3,3   | 0,7                             | 3,9  | 2,5   | 0,9     | 0,8   | 1,2   |
| <b>liver</b>            | 0,6                       | 13,7  | 3,2   | 0,9     | 10,4  | 2,7   | 0,5                             | 7,7  | 2,5   | 0,7     | 3,8   | 1,7   |
| <b>spleen</b>           | 0,3                       | 16,3  | 6,0   | 0,4     | 18,5  | 7,3   | 0,3                             | 8,9  | 4,5   | 0,4     | 1,1   | 0,6   |
| <b>pancreas</b>         | 0,2                       | 1,6   | 1,1   | 0,2     | 1,5   | 0,9   | 0,2                             | 1,1  | 0,6   | 0,3     | 0,2   | 0,3   |
| <b>kidneys</b>          | 281,5                     | 281,1 | 265,5 | 293,3   | 302,7 | 284,9 | 142,1                           | 90,3 | 159,3 | 323,7   | 117,9 | 319,4 |
| <b>Stomach</b>          | 0,7                       | 2,5   | 2,1   | 0,6     | 2,2   | 1,5   | 0,5                             | 1,5  | 0,8   | 0,6     | 0,4   | 0,6   |
| <b>small intestines</b> | 0,6                       | 7,0   | 3,6   | 0,4     | 6,8   | 3,2   | 0,3                             | 4,3  | 1,9   | 0,7     | 0,6   | 0,7   |
| <b>large intestines</b> | 0,4                       | 3,3   | 2,0   | 0,4     | 3,2   | 1,9   | 0,3                             | 2,3  | 2,1   | 0,4     | 0,3   | 0,5   |
| <b>muscle</b>           | 0,3                       | 0,9   | 0,8   | 0,2     | 0,8   | 0,6   | 0,1                             | 0,5  | 0,3   | 0,2     | 0,1   | 0,2   |
| <b>bone</b>             | 0,3                       | 1,5   | 0,8   | 0,3     | 1,1   | 0,8   | 0,2                             | 0,8  | 0,4   | 0,2     | 0,3   | 0,4   |
| <b>lymph nodes</b>      | 0,4                       | 6,8   | 3,3   | 0,7     | 6,2   | 3,7   | 0,4                             | 2,7  | 2,1   | 0,9     | 0,3   | 0,6   |
| <b>white fat</b>        | 0,2                       | 1,4   | 1,2   | 0,2     | 1,5   | 0,9   | 0,2                             | 0,9  | 0,7   | 0,2     | 0,1   | 0,2   |
| <b>brown fat</b>        | 0,3                       | 8,7   | 6,4   | 0,3     | 6,7   | 5,9   | 0,3                             | 4,8  | 5,2   | 0,4     | 0,2   | 0,5   |
| <b>tumor</b>            | 0,8                       | 6,6   | 8,1   | 0,8     | 5,2   | 3,4   | 0,4                             | 1,4  | 1,0   | 1,1     | 0,7   | 1,5   |
| <b>blood</b>            | 1,0                       | 1,0   | 1,0   | 1,0     | 1,0   | 1,0   | 1,0                             | 1,0  | 1,0   | 1,0     | 1,0   | 1,0   |

Tissue –to-blood uptake ratios of <sup>99m</sup>Tc-labeled Nbs C3 and E2 injected in wild type (WT) mice bearing wild type (WT) TC-1 cells or CD8+-depleted PD-L1 KO (KO) mice bearing PD-L1 knock-out (KO) cells (right), 80 minutes after intravenous administration of <sup>99m</sup>Tc-labeled Nbs C3 and E2. Ratios are calculated from the data presented in Supplementary Table 4 (*n* = 6).
